# Supplementary material for: Investigating the Protective Effect of Gross Saponins of Tribulus terrestris Fruit against Ischemic Stroke in Rat Using Metabolomics and Network Pharmacology
Source: MDPI journal article supplement (doi:10.3390/metabo9100240), 2019-10-21
Supplement: s1 [file s1]

Table S1 The information of the targets highlighted in this study

| Target name                                      | Gene symbol |
|--------------------------------------------------|-------------|
| Acetylcholinesterase                             | ACHE        |
| Androgen receptor                                | AR          |
| Beta-2 adrenergic receptor                       | ADRB2       |
| Cell division protein kinase 2                   | CDK2        |
| CGMP-inhibited 3',5'-cyclic phosphodiesterase A  | PDE3A       |
| Coagulation factor Xa                            | F10         |
| E-selectin                                       | SELE        |
| Estrogen receptor                                | ESR1        |
| Estrogen receptor beta                           | ESR2        |
| Glycogen synthase kinase-3 beta                  | GSK3B       |
| Interleukin-1 beta                               | IL1B        |
| Leukotriene A-4 hydrolase                        | LTA4H       |
| Mineralocorticoid receptor                       | NR3C2       |
| Mitogen-activated protein kinase 14              | MAPK14      |
| Mitogen-activated protein kinase 8               | MAPK8       |
| Muscarinic acetylcholine receptor M1             | CHRM1       |
| Muscarinic acetylcholine receptor M2             | CHRM2       |
| Nitric oxide synthase, inducible                 | NOS2        |
| Peroxisome proliferator activated receptor delta | PPARD       |
| Peroxisome proliferator activated receptor gamma | PPARG       |
| Prostaglandin G/H synthase 1                     | PTGS1       |
| Prostaglandin G/H synthase 2                     | PTGS2       |
